# Supplementary material
Source: Springer Nature journal article supplement (https://www.springermedizin.de/resource/supplementary/40035_2012_9_MOESM1_ESM.pdf/9685448)

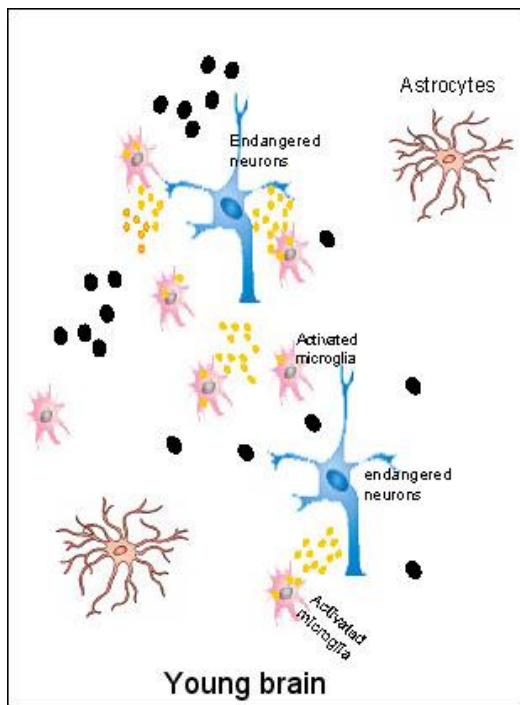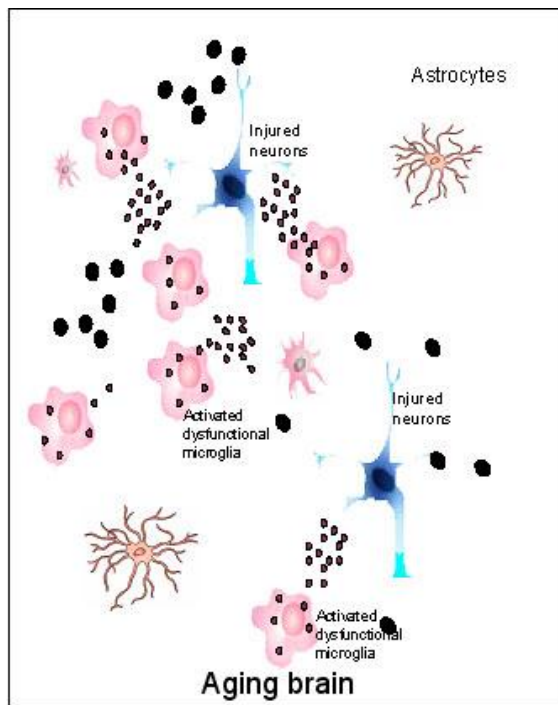

Supplement: MOESM1 [file 9685448]
